# Supplementary material for: A Non-Synonymous Single Nucleotide Polymorphism in an OPRM1 Splice Variant Is Associated with Fentanyl-Induced Emesis in Women Undergoing Minor Gynaecological Surgery
Source: PubMed Central journal article supplement (PMC3492352; doi:10.1371/journal.pone.0048416), 2012-11-07

**Supplementary Figure 1: Regions of *OPRM1* amplified by PCR and sequenced. (a) 3 kbp of 5' upstream region (promoter) (b) Main coding exons (c) 2 kbp downstream of the last main exon of *OPRM1*. Sequencing primers used are listed in supplementary Table 1 and 2. Mean number of nucleotides overlapping between sequenced regions =145 bp. Abbreviations: PCR: Polymerase chain reaction PF: forward primer for PCR PR: reverse primer for PCR.**

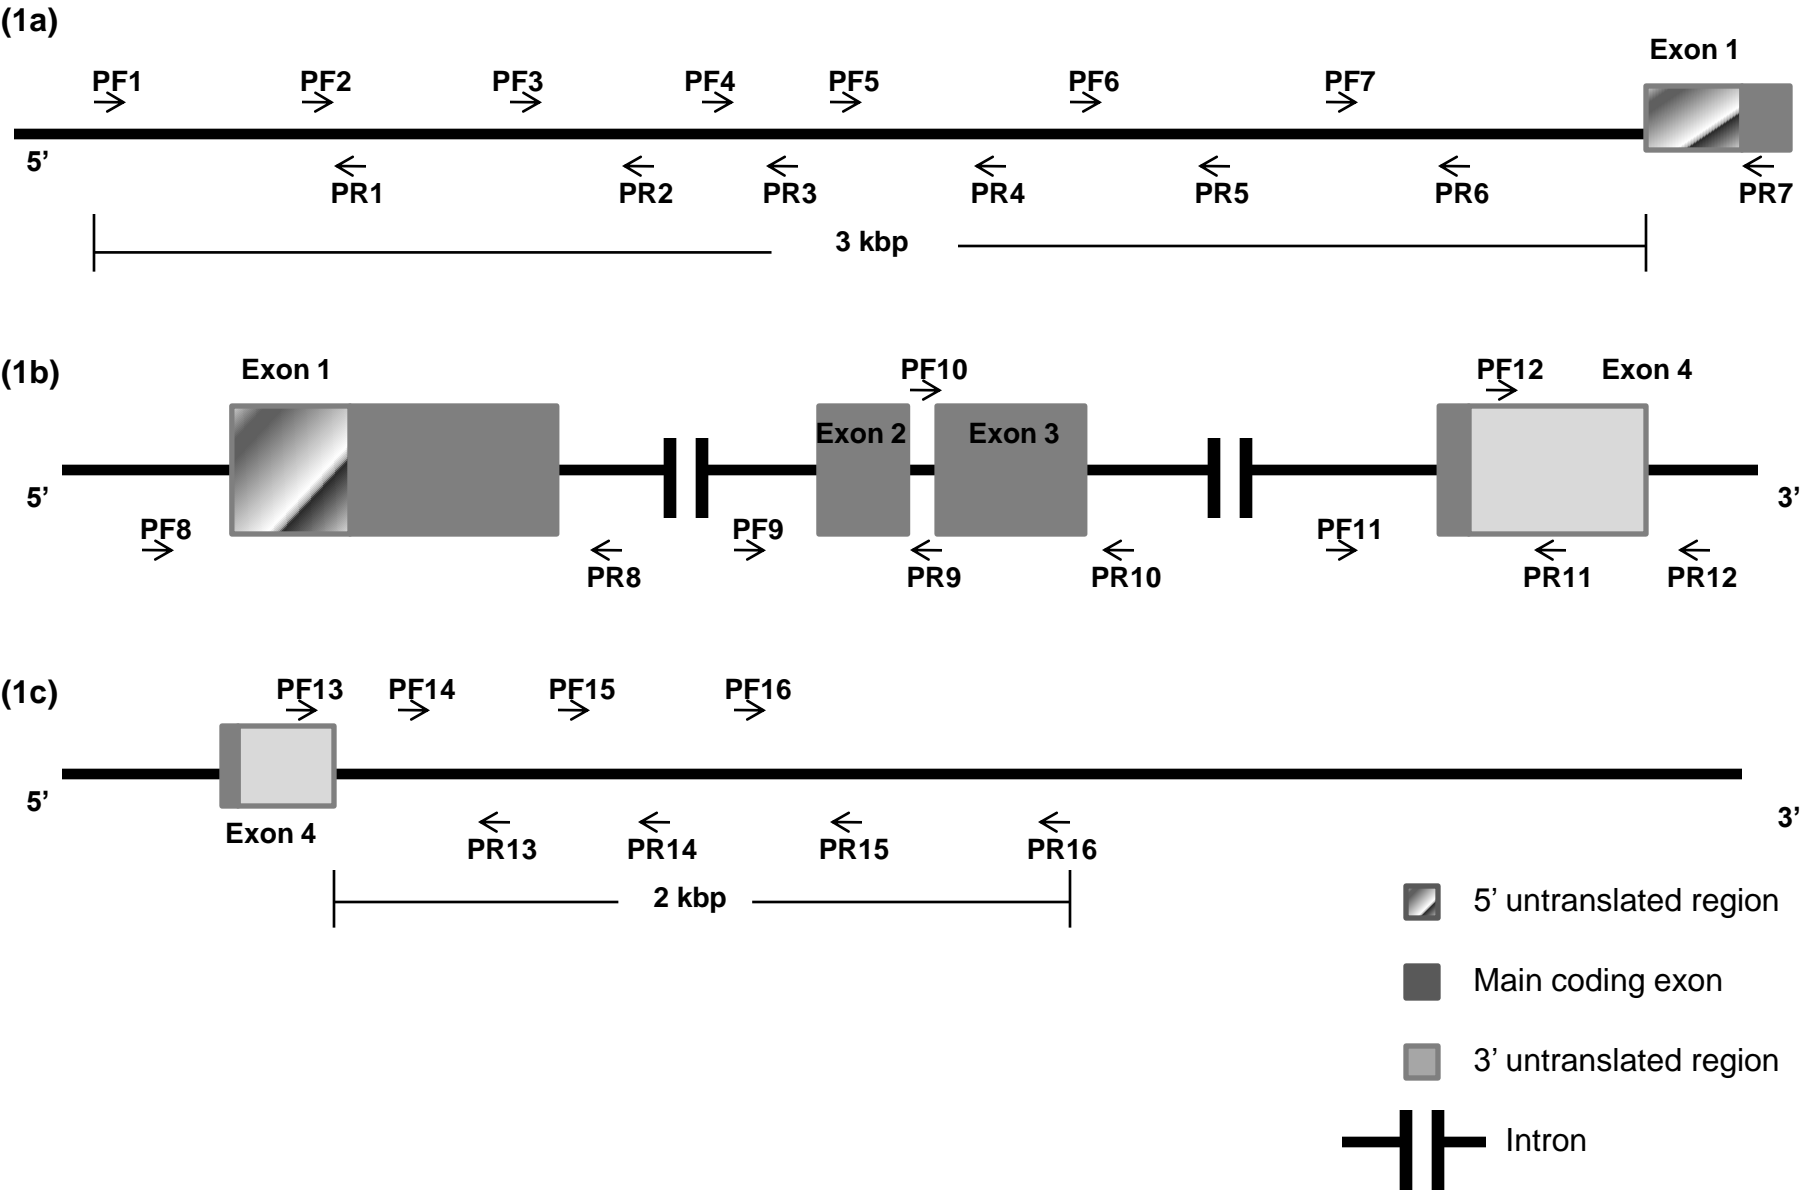

Supplement: pone.0048416.s001.pdf [file pone.0048416.s001.pdf]
