# Supplementary material for: A Non-Synonymous Single Nucleotide Polymorphism in an OPRM1 Splice Variant Is Associated with Fentanyl-Induced Emesis in Women Undergoing Minor Gynaecological Surgery
Source: PubMed Central journal article supplement (PMC3492352; doi:10.1371/journal.pone.0048416), 2012-11-07
Supplement: pone.0048416.s002.pdf [file pone.0048416.s002.pdf]

**Supplementary Figure 2: Amplified and sequenced alternative exons (AE) in *OPRM1* for 12 mu-opioid receptor (MOR) splice variants reported in the National Centre for Biotechnology Information (NCBI) database. (a) AE in intron 3 and the region 3' downstream of *OPRM1* (b) AE in the 5' region upstream of *OPRM1* (c) AE involving >1 region of *OPRM1*. Sequencing primers were located at least 100 bp away from the start and end of the AE. MOR1 is the main transcript of MOR. MOR1 exons were referred to as the main *OPRM1* exons. Other transcripts such as MOR1A and MOR1B4 are referred to as splice variants and AE's are only found in the splice variant transcripts.**

(2a)

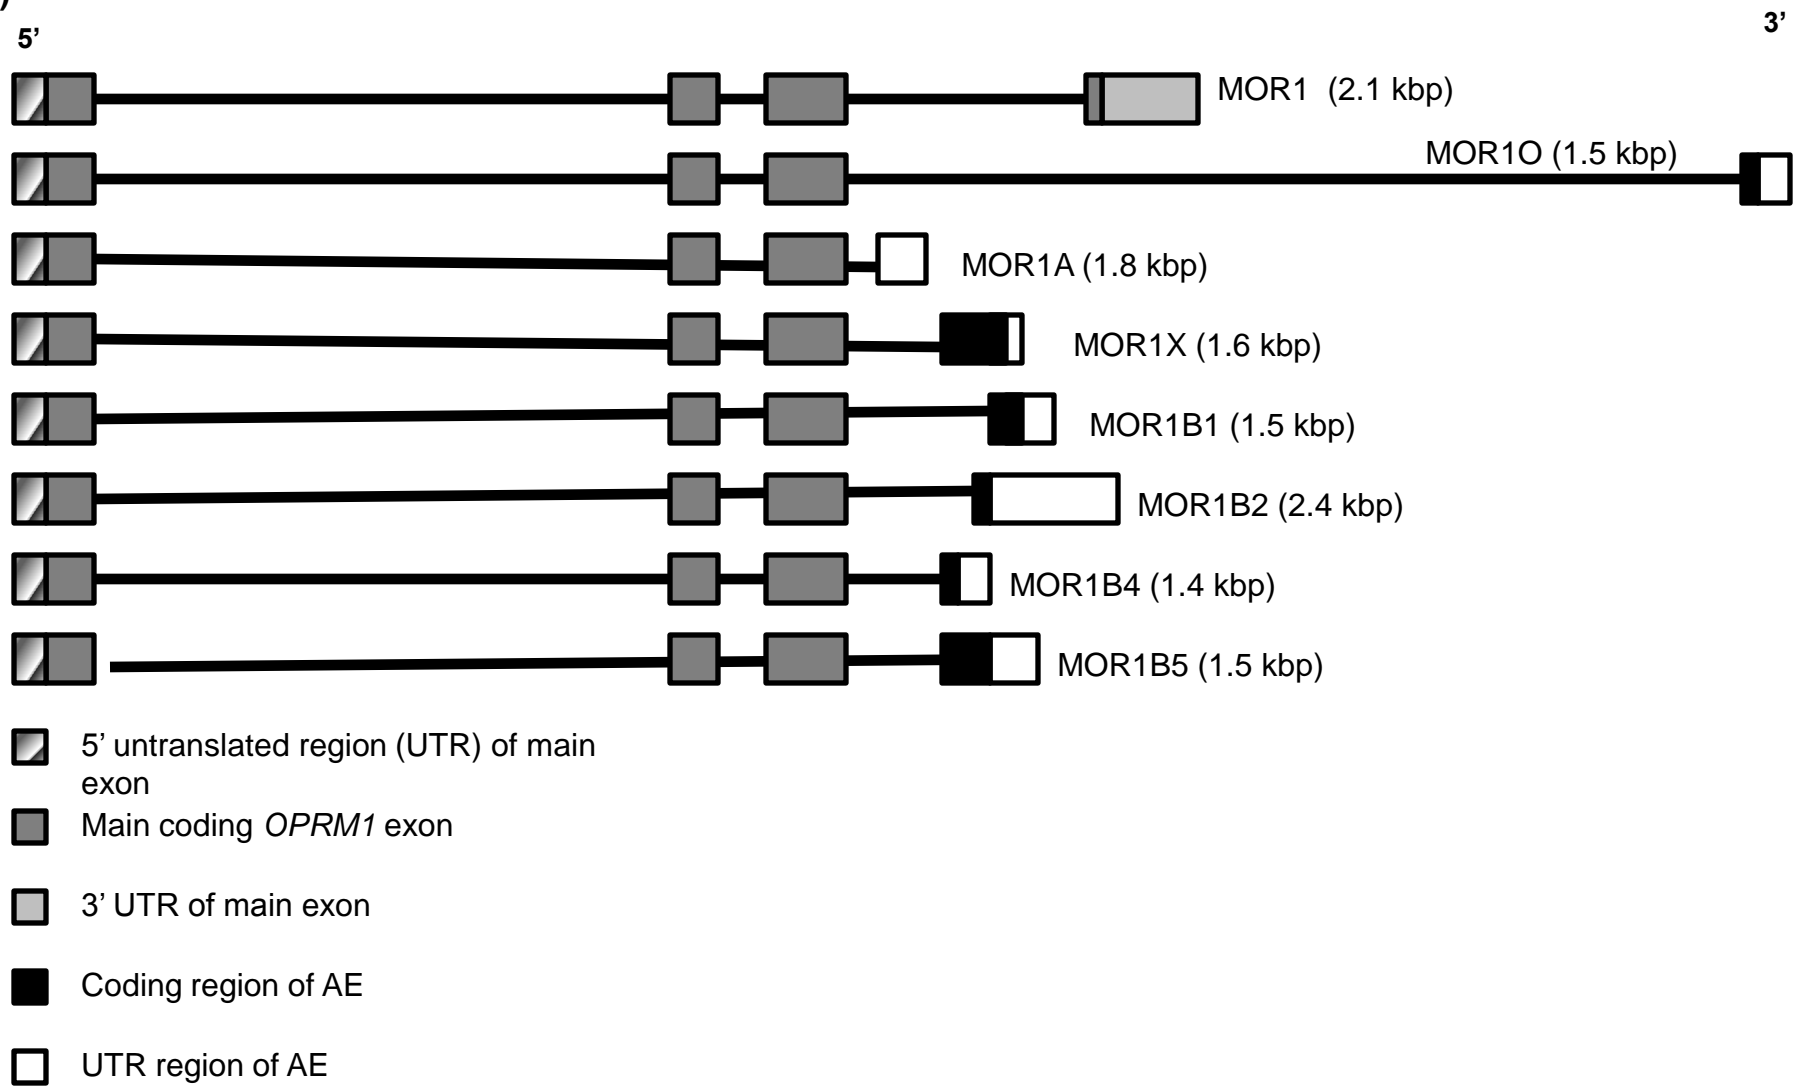

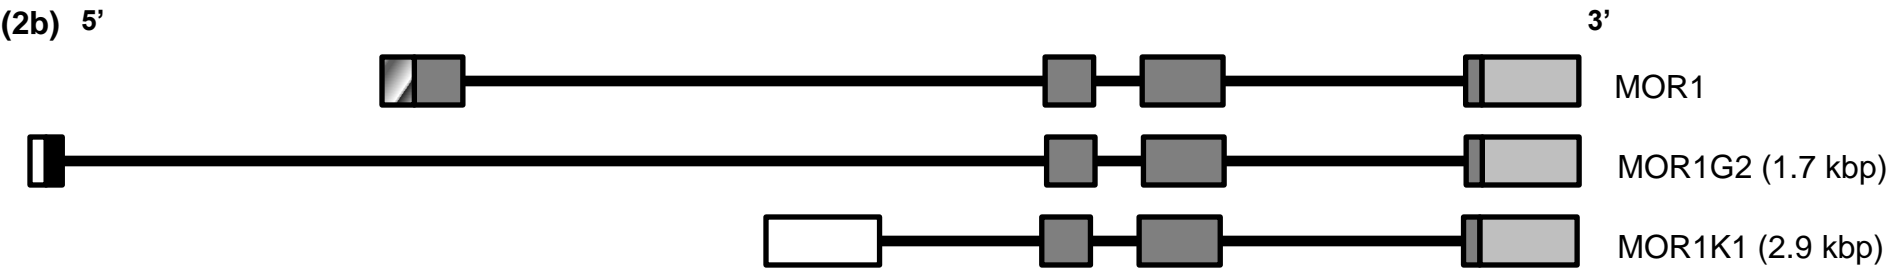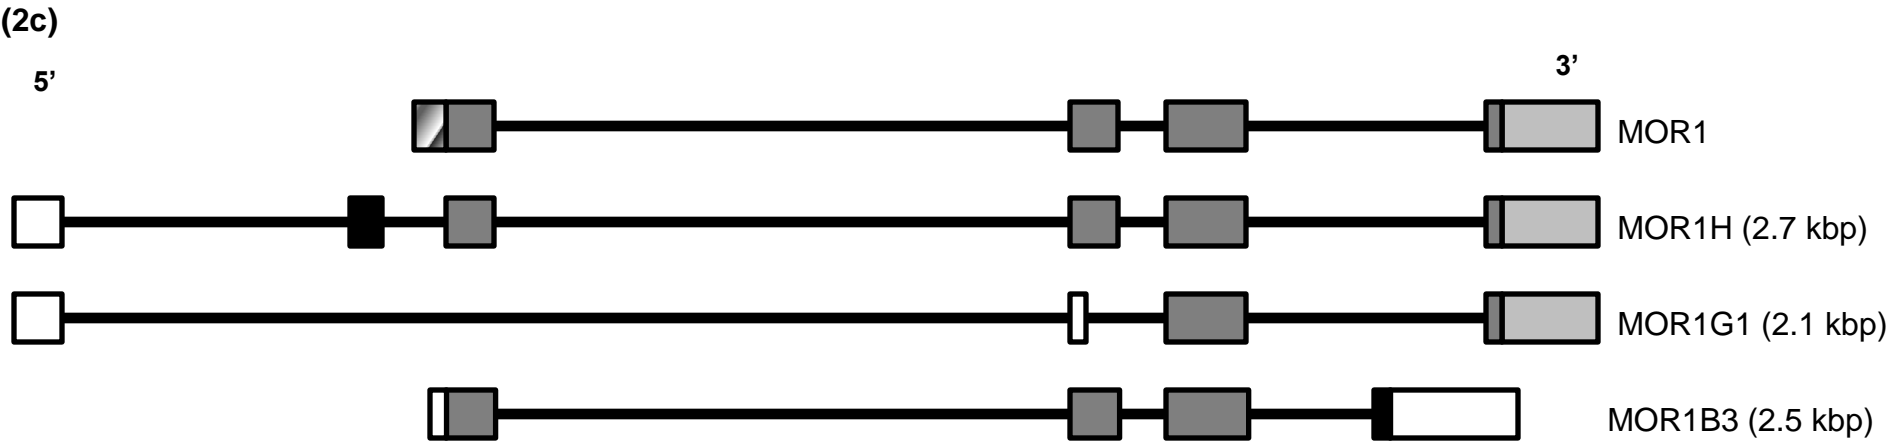

-  5' untranslated region (UTR) of main exon
-  Main coding *OPRM1* exon
-  3' UTR of main exon
-  Coding region of AE
-  UTR region of AE
